# Supplementary material for: Effects of bamboo biochar on soil physicochemical properties and microbial diversity in tea gardens
Source: PeerJ. 2024 Dec 5;12:e18642. doi: 10.7717/peerj.18642 (PMC11625445; doi:10.7717/peerj.18642)
Supplement: Supplemental Information 1 [file peerj-12-18642-s001.xlsx]

## Sheet: original data
			Sample Name	No.	pH	total nitrogen(g/kg)	alkali hydrolyzed nitrogen(mg/kg)	organic carbon(g/kg)	Available potassium(mg/kg)	Slowly available potassium(mg/kg)	available phosphorus(mg/kg)	total phosphorus(g/kg)	total potassium(g/kg)
			T1­1	Z1	4.87	4.42	599.2	47.66	557.1	1092.8	549.8	1.961	17.5
			T1­2	Z2	4.82	5.29	749.9	53.3	583.7	940	628.4	2.313	15.8
			T1­3	Z3	4.77	4.66	572.8	35.47	503	967.2	395.6	1.482	17.1
			T2­1	Z4	4.64	5.92	1120.4	63.37	675.9	1211.1	411.6	1.625	16.5
			T2­2	Z5	4.67	5.83	1187.2	57.87	603.6	1019.9	453.9	1.766	15.6
			T2­3	Z6	4.56	6.15	1156.2	67.39	682.2	1139.8	461.1	2.04	15.1
			T3­1	Z7	4.63	3.95	620.2	43.14	639	1257.5	419.1	1.66	15.2
			T3­2	Z8	4.58	4.99	696.2	49.47	628.6	1000.5	478.9	1.677	15.5
			T3­3	Z9	4.61	4.16	671.9	40.15	637.4	1176	420.5	1.58	16.1
			Y­1	Z10	4.62	3.63	460.9	39.33	491.3	1783.2	160.5	1.1	28.5
			Y­2	Z11	4.7	3.26	472.6	35.3	466.1	1641.8	177.7	1.084	29.7
			Y­3	Z12	4.67	3.76	454.1	40.86	468.9	1723.7	149.4	1.12	28.3
			P­1	Z13	4.21	2.42	348.6	33.75	123.5	1285.8	52.3	1.268	32.1
			P­2	Z14	4.23	2.44	353	30.54	119.2	1411	55.2	1.235	32.7
			P­3	Z15	4.21	2.26	334.9	29.8	118.8	1400.8	67.8	1.151	32.4
			CK­1	Z16	4.21	3.99	568.4	34.3	343.6	508	350.7	0.995	31.5
			CK­2	Z17	4.09	4.49	643.4	39.19	348.7	567	357.4	0.963	30.4
			CK­3	Z18	4.24	3.3	597.3	58.97	342.7	578.7	352.5	1.055	30.4
