# Supplementary material for: Effects of bamboo biochar on soil physicochemical properties and microbial diversity in tea gardens
Source: PeerJ. 2024 Dec 5;12:e18642. doi: 10.7717/peerj.18642 (PMC11625445; doi:10.7717/peerj.18642)
Supplement: Supplemental Information 2 [file peerj-12-18642-s002.xlsx]

## Sheet: original data
			Sample Name	No.	urease（NH4+-N mg/g·24h）	acid phosphatase （mg/g·24h）	catalase（mg/g·20min）	sucrase（mg/g·24h）	β-glucosidase（μg/g·h）
			T1­1	Z1	1.948	2.015	1.328	9.65	51.38
			T1­2	Z2	1.976	2.18	1.408	11.674	50.52
			T1­3	Z3	2.433	1.95	1.309	7.603	40.5
			T2­1	Z4	3.048	1.919	1.44	13.029	45.73
			T2­2	Z5	3.245	1.994	1.298	10.57	44.19
			T2­3	Z6	2.308	2.13	1.369	12.546	45.1
			T3­1	Z7	2.064	2.003	1.088	8.418	61.36
			T3­2	Z8	3.322	2.073	1.028	8.414	70.32
			T3­3	Z9	3.607	1.986	1.102	7.543	68.33
			CK2­1	Z10	2.541	4.091	1.2	10.451	76.74
			CK2­2	Z11	3.123	4.134	1.312	8.884	72.57
			CK2­3	Z12	3.01	6.082	1.18	9.062	69.29
			CK1­1	Z16	2.621	4.26	0.846	6.398	39.22
			CK1­2	Z17	2.832	4.336	0.842	10.01	45.28
			CK1­3	Z18	2.923	4.137	0.746	7.064	34.28
